# Supplementary material
Source: HighWire-hosted journal article supplement (https://rmdopen.bmj.com/content/9/1/e002837)
Supplement: inline-supplementary-material-1 [file inline-supplementary-material-1.pdf]

Supplementary table 1: Characteristics of included patients: (i) axSpA with psoriasis stratified into HLA-B27 positive vs. negative , (ii) PsA fulfilling clinical definition of axial manifestation stratified into HLA-B27 positive vs. negative, (iii) PsA fulfilling imaging definition stratified into HLA-B27 positive vs. negative.

|                                                    | axSpA with psoriasis |             | axPsA positive clinical definition |           | axPsA positive imaging definition |             |
|----------------------------------------------------|----------------------|-------------|------------------------------------|-----------|-----------------------------------|-------------|
|                                                    | HLA+                 | HLA-        | HLA+                               | HLA-      | HLA+                              | HLA-        |
| n                                                  | 111                  | 54          | 48                                 | 165       | 35                                | 109         |
| Female gender, n (%)                               | 36 (32)              | 31 (57)     | 27 (56)                            | 99 (60)   | 19 (54)                           | 64 (59)     |
| Age, mean (SD)                                     | 46.1 (12.8)          | 46.4 (12.4) | 46 (11.9)                          | 52 (10.9) | 48.3 (11.9)                       | 52.8 (11.1) |
| Symptom duration, mean (SD)                        | 17.2 (12.5)          | 9.4 (9.1)   | 13.3 (12.7)                        | 10 (9.8)  | 13.5 (12.6)                       | 10.3 (9)    |
| Disease duration, mean (SD)                        | 9.6 (10.9)           | 3.5 (4)     | 8.4 (7.9)                          | 6.4 (8.2) | 8.8 (8.2)                         | 6.1 (6.9)   |
| CRP mg/l, mean (SD)                                | 10.3 (15.8)          | 12.1 (18.2) | 12.2 (20.5)                        | 7.3 (9.6) | 9 (20)                            | 6 (6.5)     |
| CRP >=5 mg/L, n (%)                                | 45 (45)              | 21 (42)     | 21 (50)                            | 55 (35)   | 11 (35)                           | 40 (40)     |
| BMI, mean (SD)                                     | 28.3 (5.4)           | 28.3 (6)    | 27.9 (5.7)                         | 29 (6.5)  | 27.7 (5.8)                        | 28.5 (6.2)  |
| Obesity (BMI>=30), n (%)                           | 35 (34)              | 20 (38)     | 13 (27)                            | 61 (37)   | 9 (26)                            | 36 (34)     |
| peripheral manifestations, n (%)                   | 31 (28)              | 26 (48)     | 35 (73)                            | 143 (87)  | 28 (80)                           | 100 (92)    |
| Uveitis, ever, n (%)                               | 22 (20)              | 4 (7)       | 8 (17)                             | 1 (1)     | 6 (17)                            | 1 (1)       |
| IBD, ever, n (%)                                   | 7 (6)                | 6 (11)      | 3 (6)                              | 8 (5)     | 2 (6)                             | 5 (5)       |
| physician global disease activity (NRS), mean (SD) | 5.9 (2.2)            | 5.3 (2)     | 5.5 (1.8)                          | 5.5 (1.9) | 5.4 (1.9)                         | 5.4 (1.9)   |
| patient global disease activity (NRS), mean (SD)   | 5.7 (2.4)            | 5.7 (2.7)   | 6 (2.3)                            | 5.9 (2.4) | 5.8 (2)                           | 5.9 (2.3)   |
| patient pain (NRS), mean (SD)                      | 5.7 (2.4)            | 5.8 (2.5)   | 5.5 (2.7)                          | 5.8 (2.3) | 5.5 (2.6)                         | 5.7 (2.2)   |
| Sleep disorder (NRS), mean (SD)                    | 5.7 (3)              | 5.8 (2.7)   | 5.2 (3.4)                          | 5.7 (3)   | 4.5 (3.7)                         | 5.8 (2.9)   |
