# Supplementary material
Source: HighWire-hosted journal article supplement (https://rmdopen.bmj.com/content/9/1/e002837)
Supplement: inline-supplementary-material-2 [file inline-supplementary-material-2.pdf]

Supplementary table 2: Characteristics of patients with radiographic score separated by diagnosis and those who fulfill modified New York criteria (radiographic) and patients who do not fulfill these criteria (non-radiographic)

|                                                    | axSpA        |                  | axPsA        |                  |
|----------------------------------------------------|--------------|------------------|--------------|------------------|
|                                                    | radiographic | non-radiographic | radiographic | non-radiographic |
| n                                                  | 67           | 29               | 37           | 142              |
| Female gender, n (%)                               | 21 (31)      | 16 (55)          | 14 (38)      | 77 (54)          |
| Age, mean (SD)                                     | 46.9 (13.7)  | 47.4 (12.6)      | 56.5 (8.4)   | 50.5 (12.1)      |
| Symptom duration, mean (SD)                        | 18.9 (12.5)  | 12 (10)          | 16.5 (12.6)  | 8.3 (6.6)        |
| Disease duration, mean (SD)                        | 11.6 (11.3)  | 4.9 (6.3)        | 10.7 (9.9)   | 5.6 (5.6)        |
| HLA B-27 positive, n (%)                           | 55 (85)      | 17 (65)          | 13 (42)      | 19 (17)          |
| CRP mg/l, mean (SD)                                | 13 (19)      | 12.1 (19.3)      | 7 (6.4)      | 7.6 (11.3)       |
| CRP $\geq$ 5 mg/L, n (%)                           | 31 (49)      | 16 (57)          | 18 (51)      | 55 (41)          |
| BMI, mean (SD)                                     | 27.4 (5.7)   | 28.6 (6.4)       | 30 (6.4)     | 29 (6.4)         |
| Obesity (BMI $\geq$ 30), n (%)                     | 21 (32)      | 8 (30)           | 14 (40)      | 53 (38)          |
| peripheral manifestations, n (%)                   | 14 (21)      | 16 (55)          | 32 (86)      | 125 (88)         |
| Uveitis, ever, n (%)                               | 18 (27)      | 2 (7)            | 2 (5)        | 4 (3)            |
| IBD, ever, n (%)                                   | 5 (7)        | 3 (10)           | 4 (11)       | 1 (1)            |
| physician global disease activity (NRS), mean (SD) | 5.9 (2.4)    | 5.5 (2.1)        | 5.1 (2)      | 5.1 (1.9)        |
| patient global disease activity (NRS), mean (SD)   | 5.5 (2.5)    | 6.1 (2.4)        | 5.8 (2.1)    | 5.6 (2.3)        |
| patient pain (NRS), mean (SD)                      | 5.5 (2.5)    | 6.1 (2.4)        | 5.9 (2.1)    | 5.3 (2.4)        |
| Sleep disorder (NRS), mean (SD)                    | 5.7 (3)      | 6.1 (3.2)        | 6.1 (2.8)    | 5.2 (3.1)        |
